# Supplementary material for: Inhaled Placental Mesenchymal Stromal Cell Secretome from Two- and Three-Dimensional Cell Cultures Promotes Survival and Regeneration in Acute Lung Injury Model in Mice
Source: MDPI journal article supplement (doi:10.3390/ijms23073417), 2022-03-22
Supplement: s1 [file s1]

Supplementary Materials

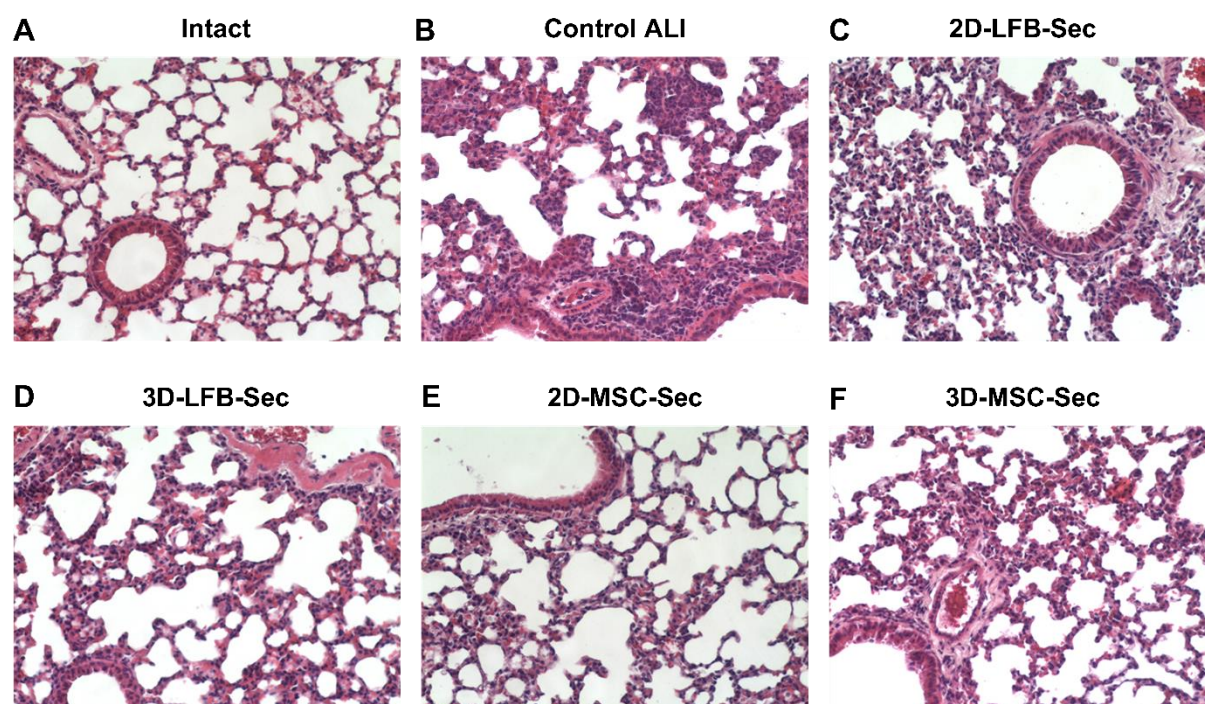

**Figure S1.** Histology examination of the lungs. (A–F) Lung tissue structure in the control group and on day 8 of LPS-induced ALI, either in nontreated mice or after lyophilizate inhalation. Sections were stained with hematoxylin and eosin;  $\times 200$  magnification. LPS, lipopolysaccharide; ALI, acute lung injury; MSC, mesenchymal stromal cell; LFB, lung fibroblast.
